# Supplementary material for: A Pilot Study on the Concentration, Distribution and Bioaccumulation of Polybrominated Diphenyl Ethers (PBDEs) in Tissues and Organs of Grassland Sheep
Source: MDPI journal article supplement (doi:10.3390/ijerph191912170), 2022-09-26
Supplement: s1 [file s1]

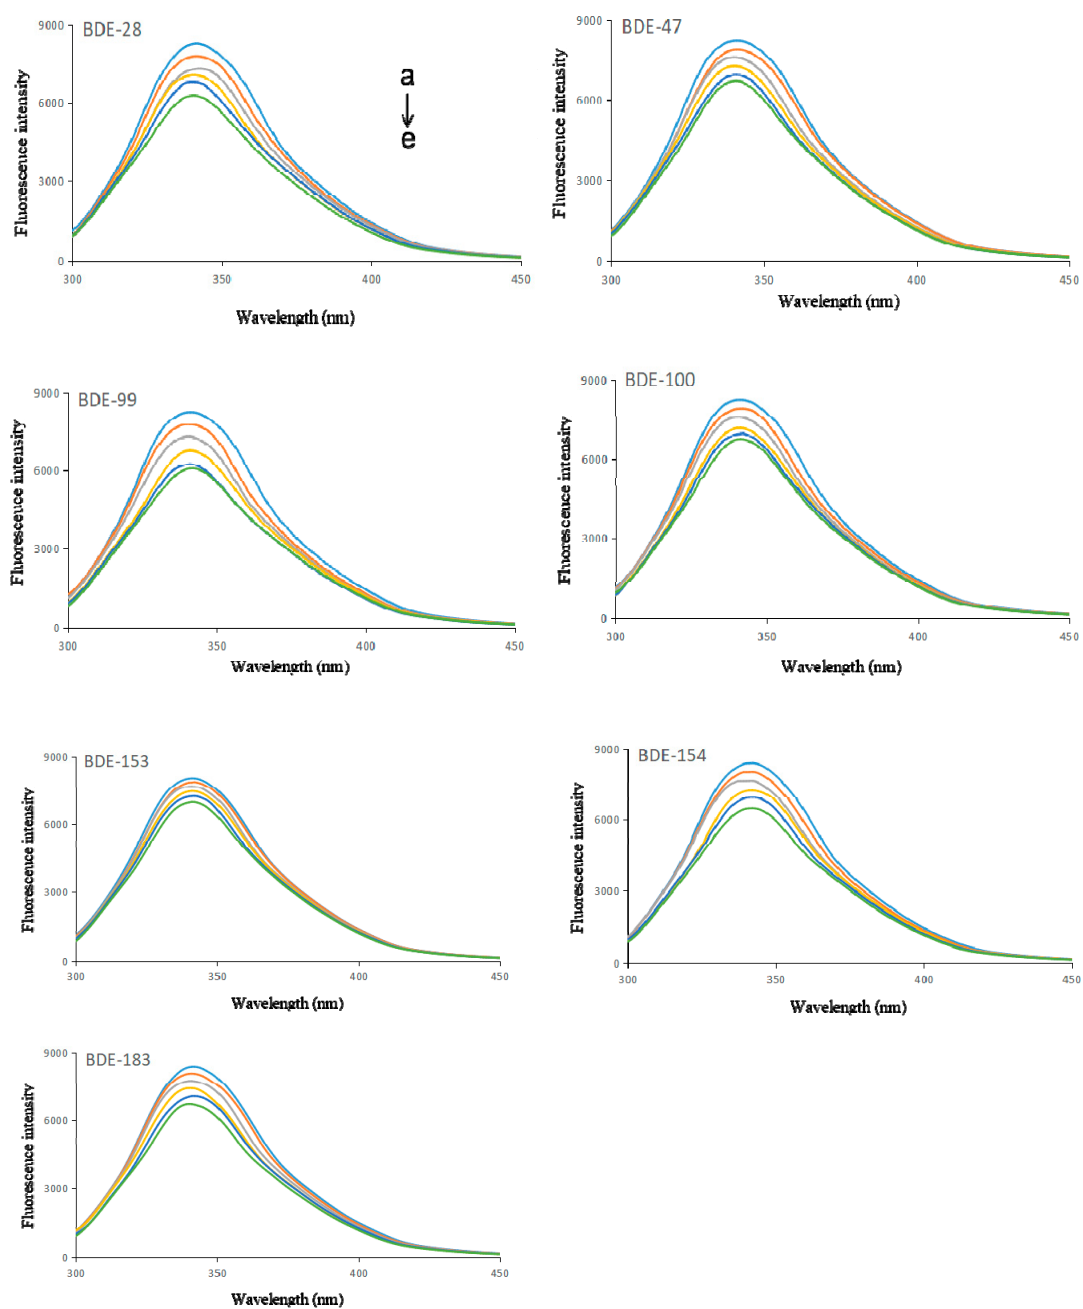

**Figure S1.** Fluorescence spectra of the interaction between PBDE and ovine serum albumin (OSA) at 300 K,  $\lambda_{ex} = 280$  nm. a-e concentrations were 0,  $2 \times 10^{-7}$ ,  $4 \times 10^{-7}$ ,  $6 \times 10^{-7}$ ,  $8 \times 10^{-7}$ , and  $10 \times 10^{-7}$  mol/L.

**Table S1.** Binding constants and binding sites of PBDE and OSA

| PBDE    | $K_A$ (L/mol)      | $n$    | $R^2$  | $\Delta H$<br>(cal/mol) | $\Delta S$<br>(cal/mol) |
|---------|--------------------|--------|--------|-------------------------|-------------------------|
| BDE-183 | $1.32 \times 10^4$ | 1.1701 | 0.9992 | -10.14                  | 34.25                   |
| BDE-153 | $1.22 \times 10^4$ | 1.2194 | 0.9992 | -9.73                   | 33.97                   |
| BDE-154 | $1.18 \times 10^4$ | 1.1425 | 0.9972 | -9.50                   | 33.84                   |
| BDE-99  | $9.33 \times 10^3$ | 1.0837 | 0.9923 | -9.01                   | 33.00                   |
| BDE-100 | $4.56 \times 10^3$ | 1.0632 | 0.9908 | -8.84                   | 29.42                   |
| BDE-47  | $3.46 \times 10^3$ | 1.0330 | 0.9994 | -8.59                   | 28.53                   |
| BDE-28  | $2.70 \times 10^3$ | 0.9793 | 0.9916 | -8.14                   | 22.10                   |
